# Supplementary material for: Fabrication of a 2,4-dinitrophenol sensor based on Fe3O4@Ag@Ni nanomaterials and studies on their antibacterial properties
Source: Royal Society of Chemistry journal article supplement (doi:10.1039/c7nj04378c), 2017-12-01
Supplement: c7nj04378c1.pdf [file c7nj04378c1.pdf]

## Supplementary Information

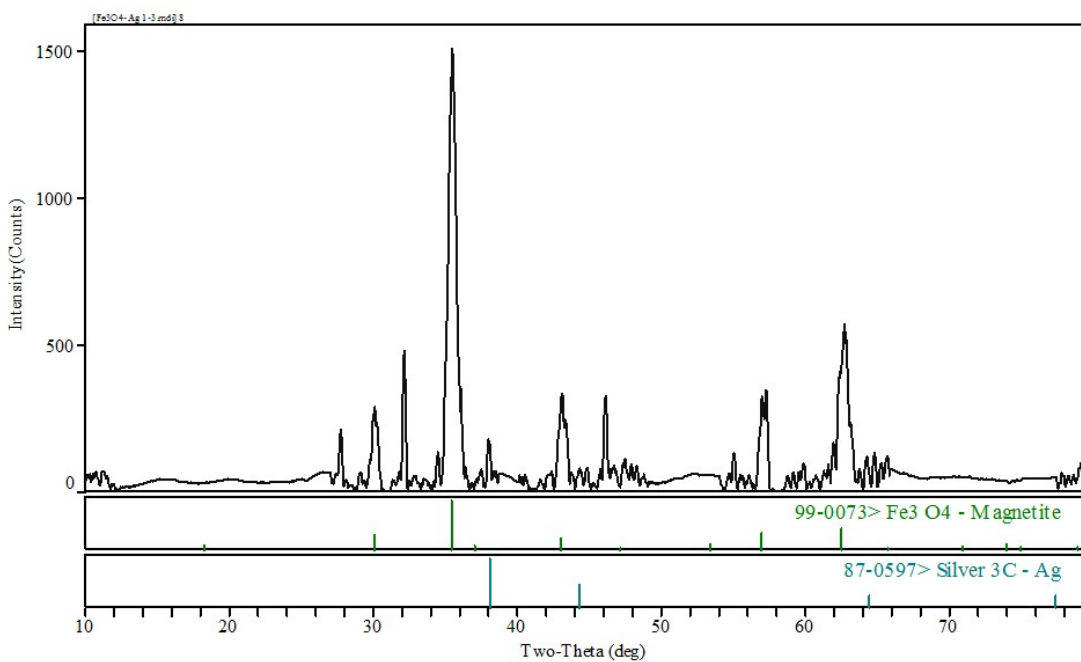

(a)

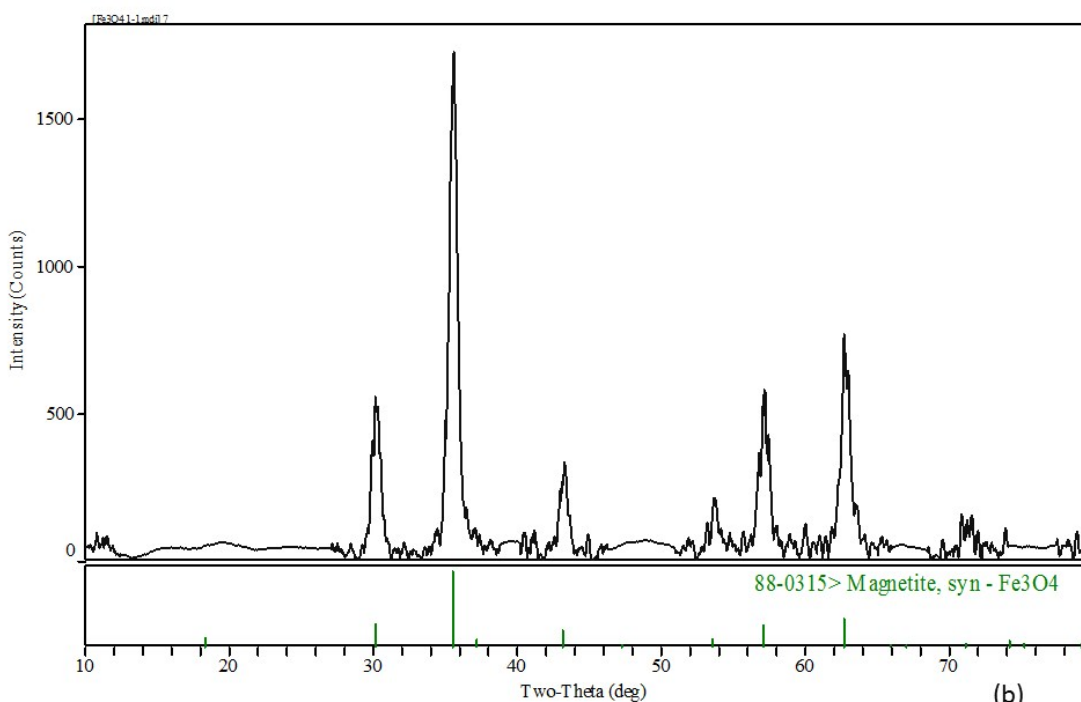

(b)

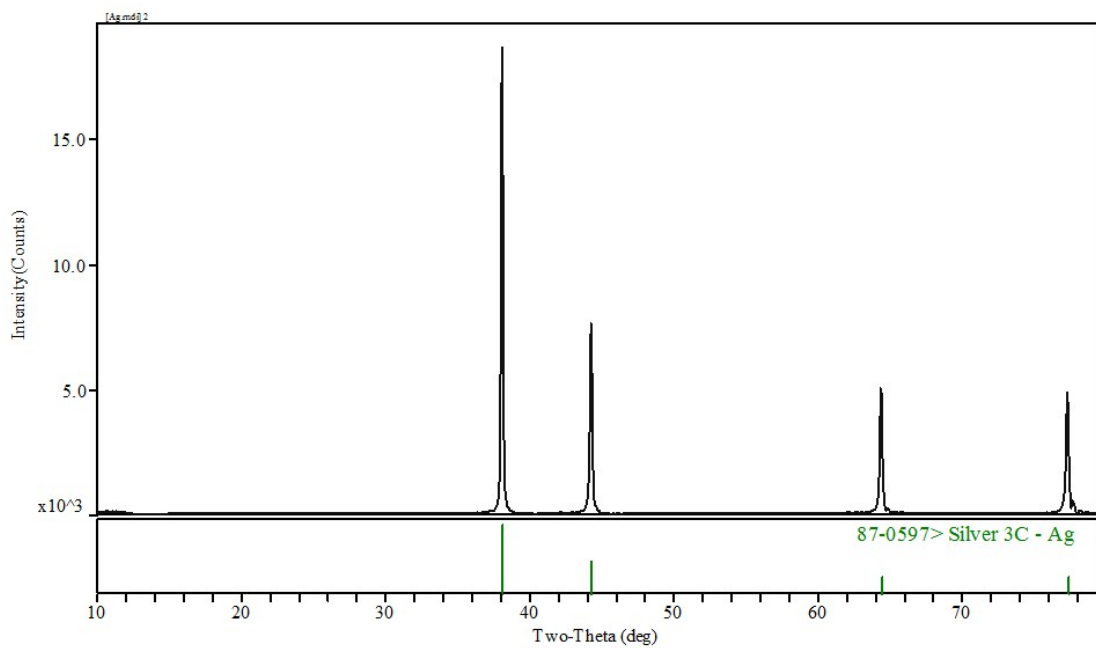

(c)

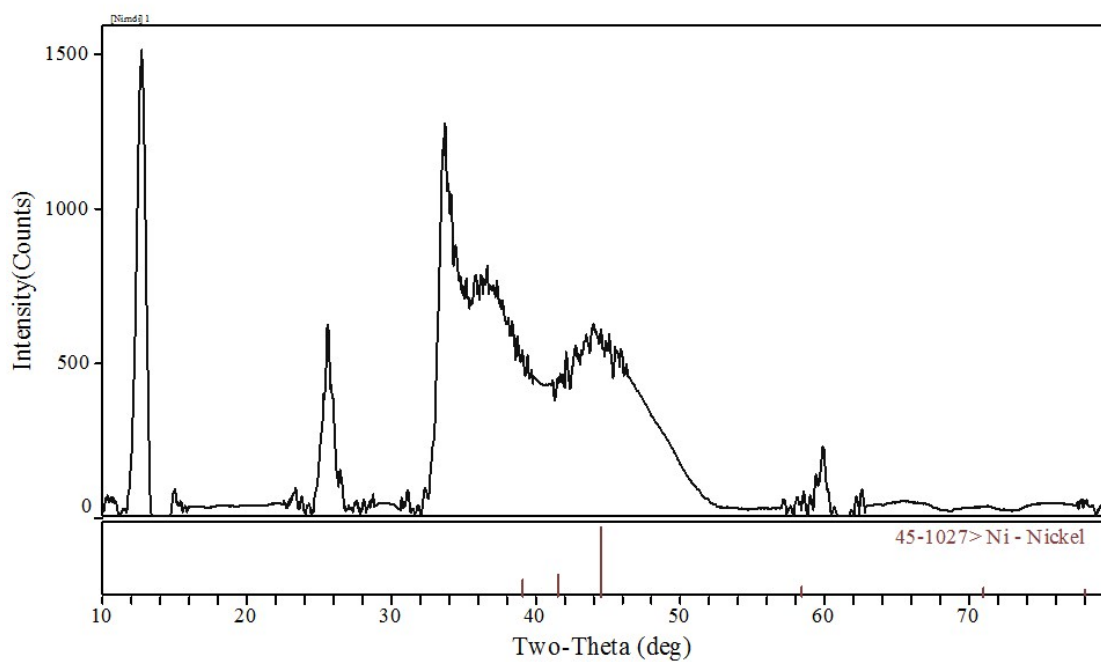

(d)

**Figure. S1:** XRD pattern of (a)  $\text{Fe}_3\text{O}_4@Ag$  nanocomposite, (b)  $\text{Fe}_3\text{O}_4$ , (c) Ag and (d) Ni nanoparticle

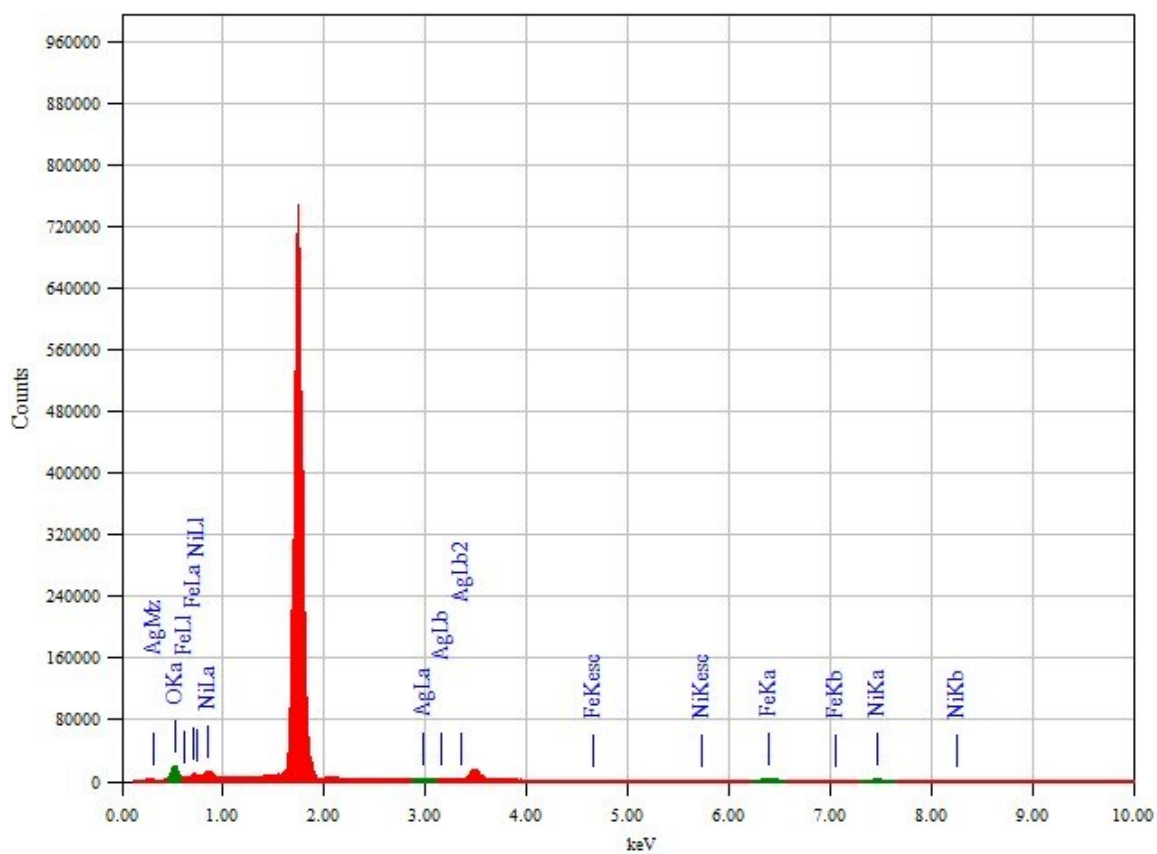

**Figure S2:** EDS spectrum of Fe<sub>3</sub>O<sub>4</sub>@Ag@Ni nanocomposite

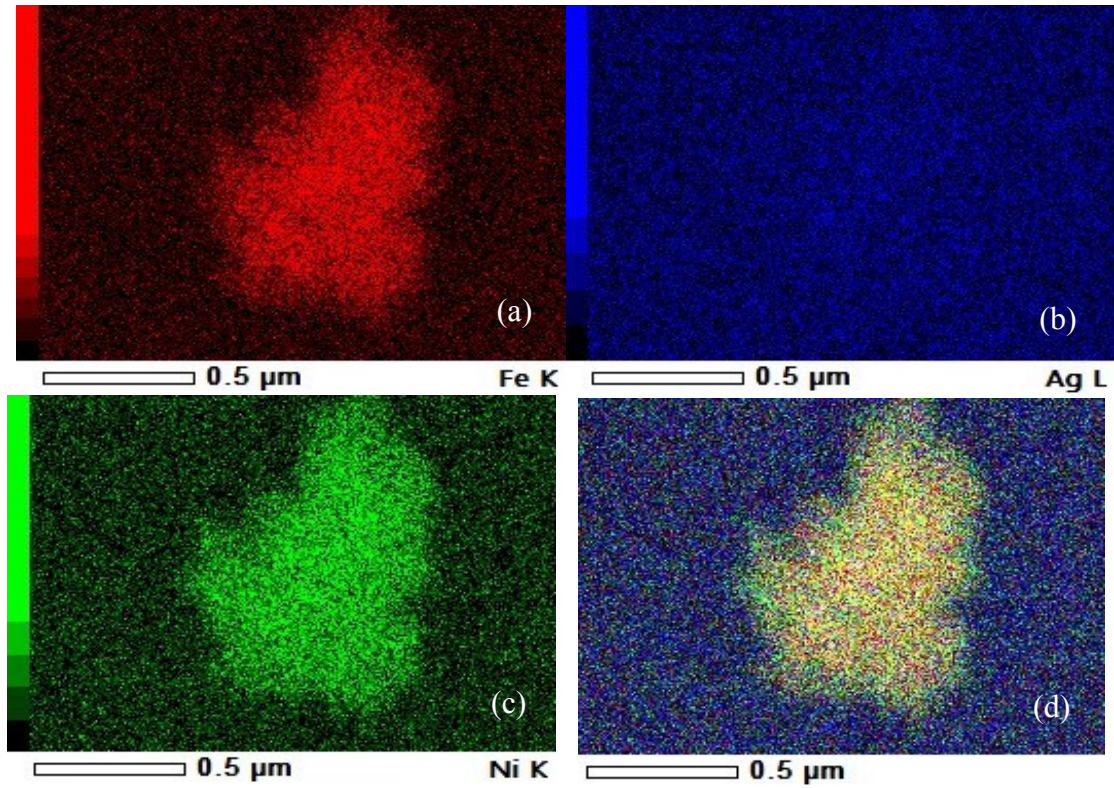

**Fig. S3:** EDS mapping of  $\text{Fe}_3\text{O}_4@\text{Ag}@\text{Ni}$  nanocomposite surface with (a) Fe, (b) Ag, (c) Ni, and (d) Overlap

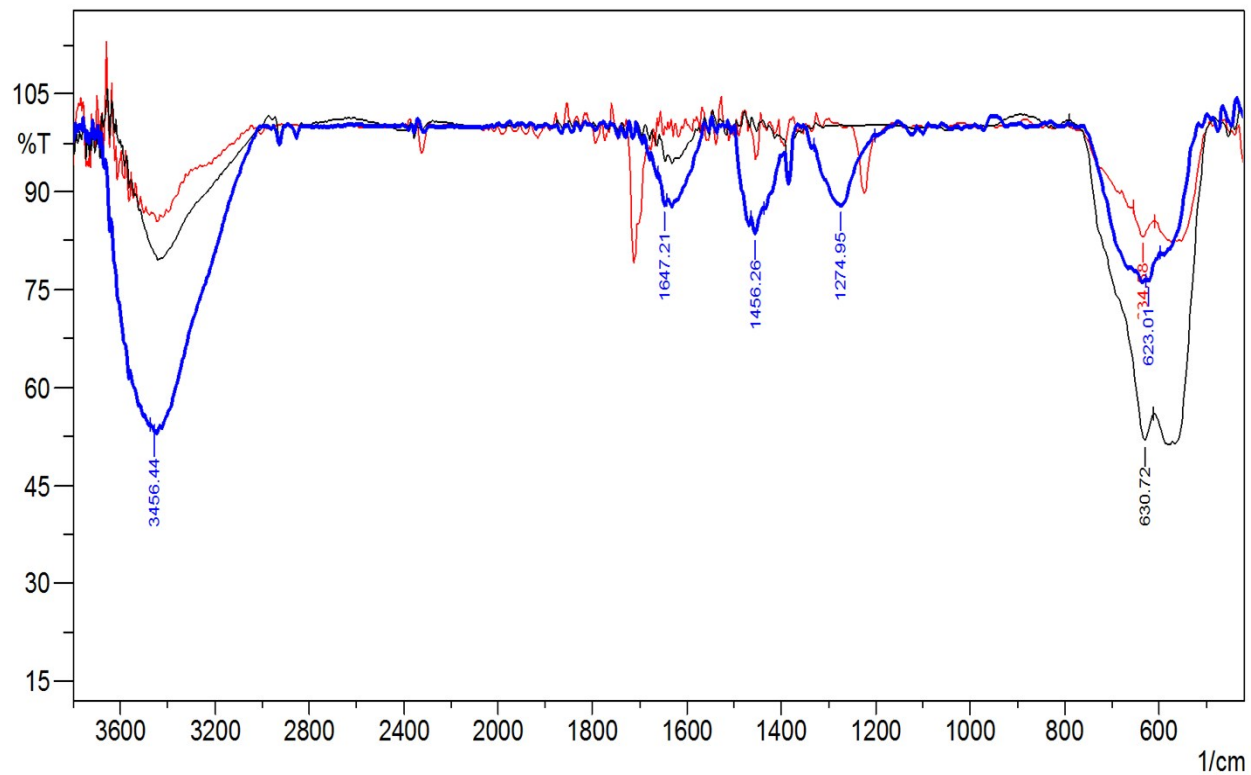

**Fig. S4:** FTIR Spectra of Fe<sub>3</sub>O<sub>4</sub>(red), Fe<sub>3</sub>O<sub>4</sub>@Ag (black) and Fe<sub>3</sub>O<sub>4</sub>@Ag@Ni nanocomposite (blue)

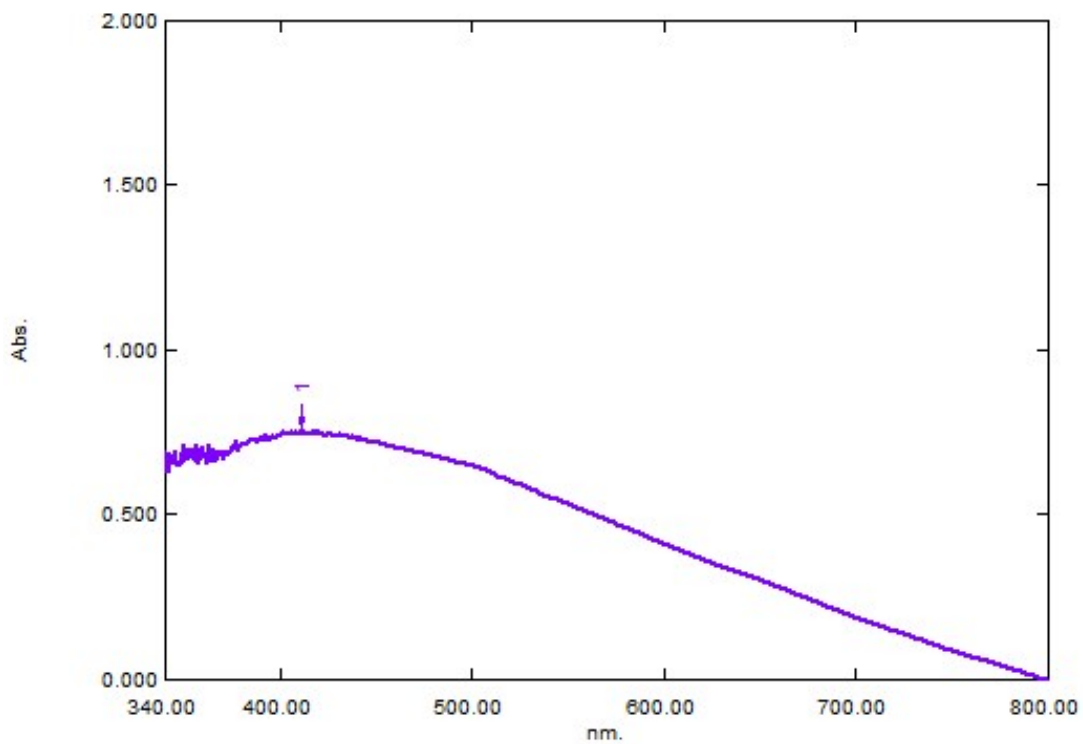

**Fig. S5:** UV-Visible spectrum of  $\text{Fe}_3\text{O}_4@\text{Ag}@\text{Ni}$  nanocomposite

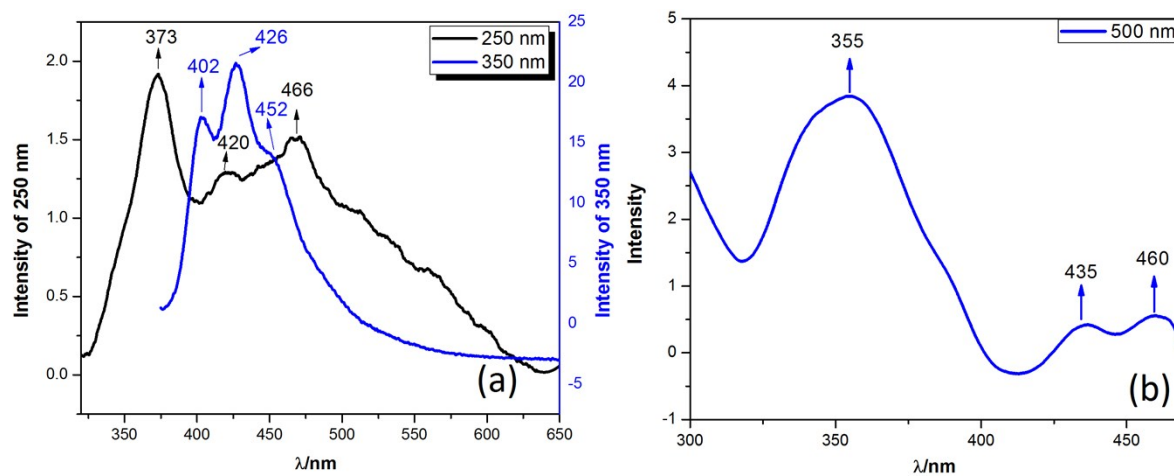

**Fig. S6:** (a) PL and (b) PLE spectrum of  $\text{Fe}_3\text{O}_4@\text{Ag}$  nanocomposite

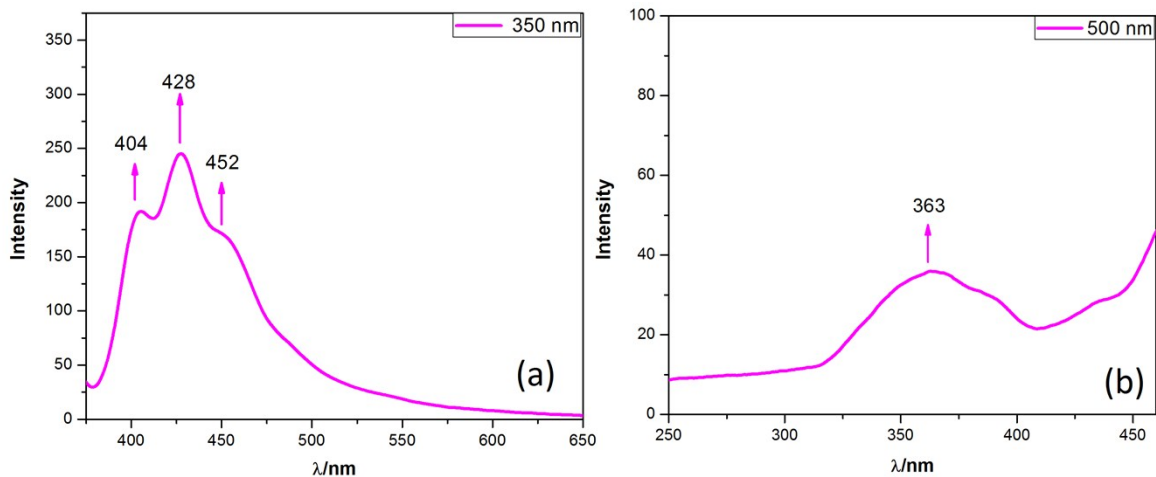

**Fig. S7:** (a) PL and (b) PLE spectrum of  $\text{Fe}_3\text{O}_4$  nanoparticle

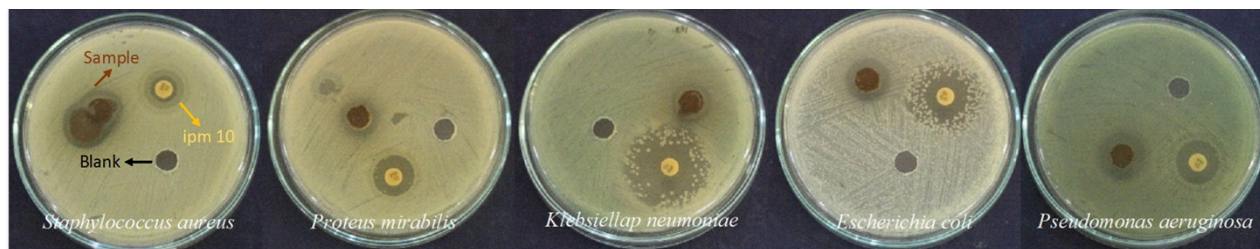

**Fig. S8:** Antibacterial properties of  $\text{Fe}_3\text{O}_4@\text{Ag}@\text{Ni}$  nanocomposite

**Table S1:** Elemental composition of  $\text{Fe}_3\text{O}_4@\text{Ag}@\text{Ni}$  nanocomposite from EDS

| Element | (keV) | Mass% | Sigma | Atom% | K       |
|---------|-------|-------|-------|-------|---------|
| O K     | 0.525 | 37.52 | 0.15  | 68.34 | 48.0078 |
| Fe K    | 6.398 | 28.95 | 0.25  | 15.11 | 25.0339 |
| Ni K    | 7.471 | 33.12 | 0.36  | 16.44 | 26.6642 |
| Ag L    | 2.983 | 0.42  | 0.11  | 0.11  | 0.2941  |
| Total   |       | 100   |       | 100   |         |

**Table S2:** PL and PLE peaks maxima of synthesized Fe<sub>3</sub>O<sub>4</sub>@Ag@Ni, Fe<sub>3</sub>O<sub>4</sub>@Ag and Fe<sub>3</sub>O<sub>4</sub> nanoparticles

| Sample                                | Method                         | Excitation or monitor Wavelength/nm | Peaks Observed at Wavelength/nm |
|---------------------------------------|--------------------------------|-------------------------------------|---------------------------------|
| Fe <sub>3</sub> O <sub>4</sub> @Ag@Ni | PL                             | 340                                 | 380, 397, 425 and 454           |
|                                       |                                | 350                                 | 380, 404, 430 and 455           |
|                                       |                                | 460                                 | 502                             |
|                                       | PLE                            | 500                                 | 358, 433 and 463                |
|                                       |                                | 550                                 | 280, 354 and 384                |
| Fe <sub>3</sub> O <sub>4</sub> @Ag    | PL                             | 250                                 | 373, 420 and 466                |
|                                       |                                | 350                                 | 402, 435 and 452                |
|                                       | PLE                            | 500                                 | 355, 435 and 460                |
|                                       | Fe <sub>3</sub> O <sub>4</sub> | PL                                  | 350                             |
| PLE                                   |                                | 500                                 | 363                             |
